# Supplementary material
Source: MDPI journal article supplement (https://www.mdpi.com/2673-9976/11/1/78)
Supplement: s1 [file s1]

**IECPS  
2021**

# The 2nd International Electronic Conference on Plant Science

01-15 DECEMBER 2021 | ONLINE

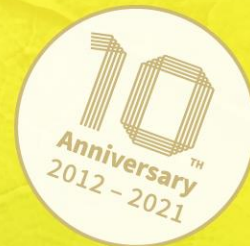

Chaired by **DR. ADRIANO SOFO**

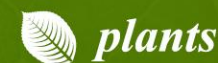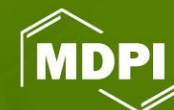

**Maria Giordano<sup>1,\*</sup>**

**<sup>1</sup>Department of Agricultural Sciences, University of Naples Federico II, 80055  
Portici, Italy**

\* Corresponding author: [maria.giordano@unina.it](mailto:maria.giordano@unina.it)

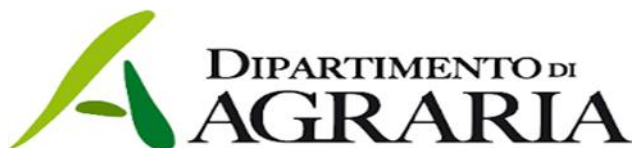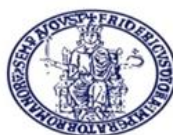

UNIVERSITÀ DEGLI STUDI DI NAPOLI  
**FEDERICO II**

## **Abstract: Effects of plant-based biostimulants, used alone or in combination, on yield and quality of rocket plants**

The climatic conditions over the last few decades were estimated by the Intergovernmental Panel on Climate Change (IPCC) to be the warmest of any previous decade. Climate change refers to anomalous, intense, and catastrophic climatic events directly linked to the increase in temperature on Earth. These are hurricanes, floods, melting glaciers, etc. In this context, agriculture is subject to strong abiotic stresses that compromise food safety. It is therefore necessary to resort to agricultural practices that reduce the impact of agriculture on the environment, and guarantee crops production. An important answer to this problem comes from the use of biostimulants in agriculture. These are microorganisms and molecules of natural origin able to increase fertilizers effectiveness, by limiting their use. In this study, two different plant-based biostimulants were used alone and in combination to test their effectiveness on production, mineral content, and some quality parameters of greenhouse-grown rocket plants. Biostimulant treatments showed an average increase of 48.1% of the total yield and 37.2% of dry biomass of the plants, compared to control plants, without significant differences among treatments. An increase in chlorophyll, calcium, magnesium, and potassium was detected in the presence of the two biostimulants, too. Vitamin C content increased, as compared to the control when the two biostimulants were combined. This study focused on biostimulants as eco-sustainable products able to increase the yield and quality of such crops as rocket.

**Keywords:** Plant biostimulants; eco-friendly practices; Vitamin C; Minerals; synergistic interactionons

# Graphical Abstract

## Effects of plant-based biostimulants, used alone or in combination, on yield and quality of rocket plants

### Origin of biostimulants

#### Leather

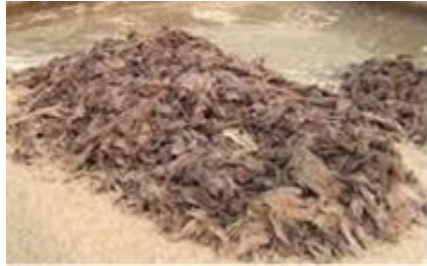

#### Fish

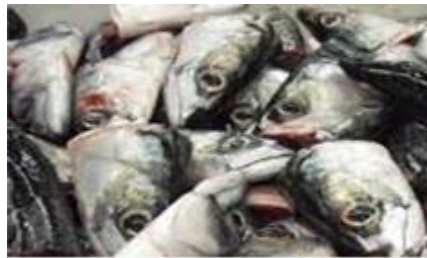

#### Plants

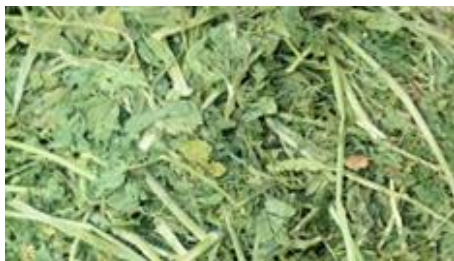

### Protein hydrolysates :

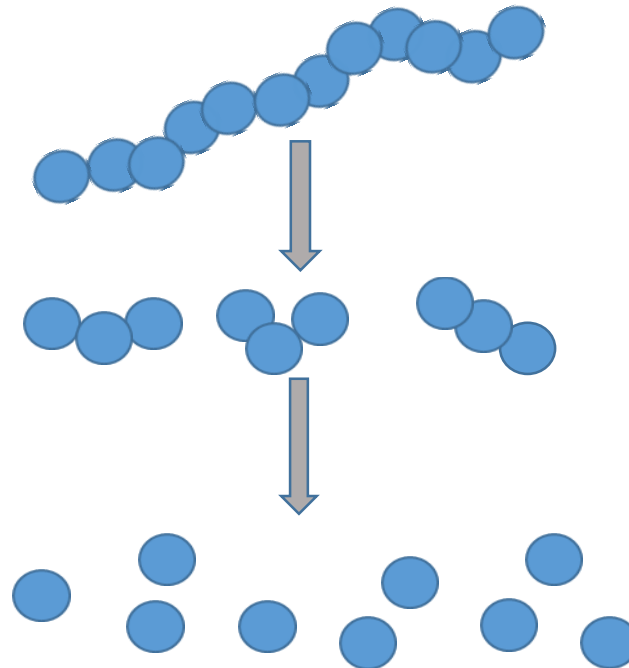

### Application:

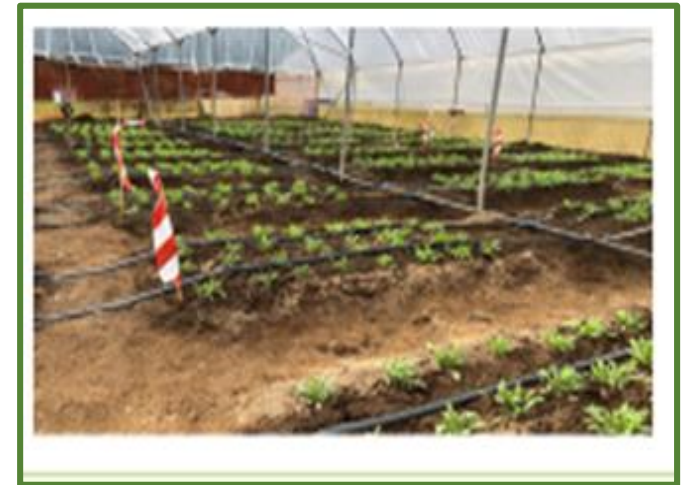



# The Current State of the Climate

How do we know humans are causing climate change?

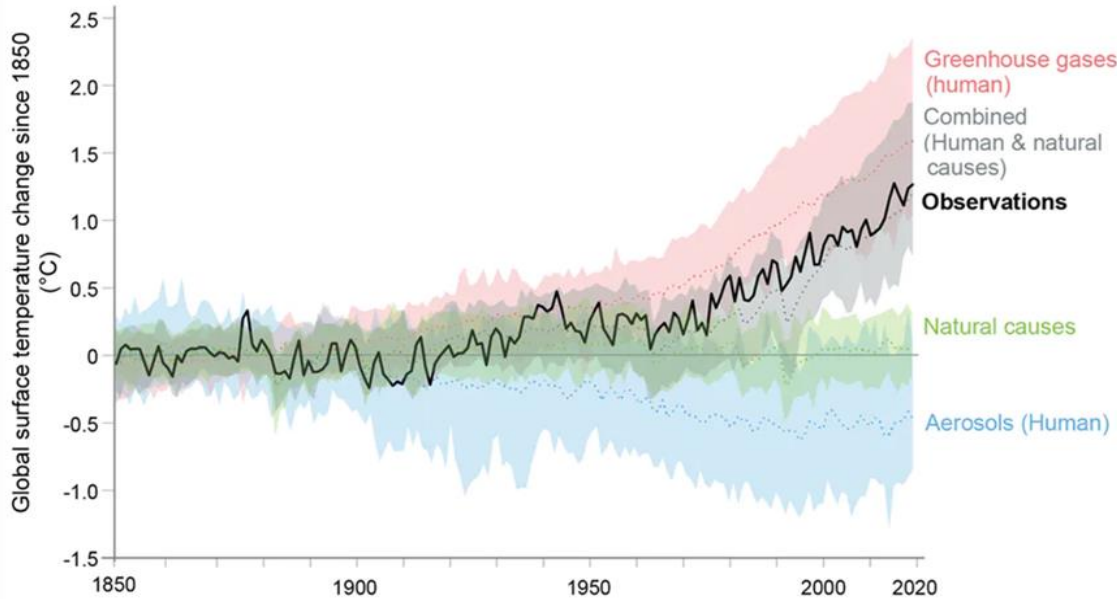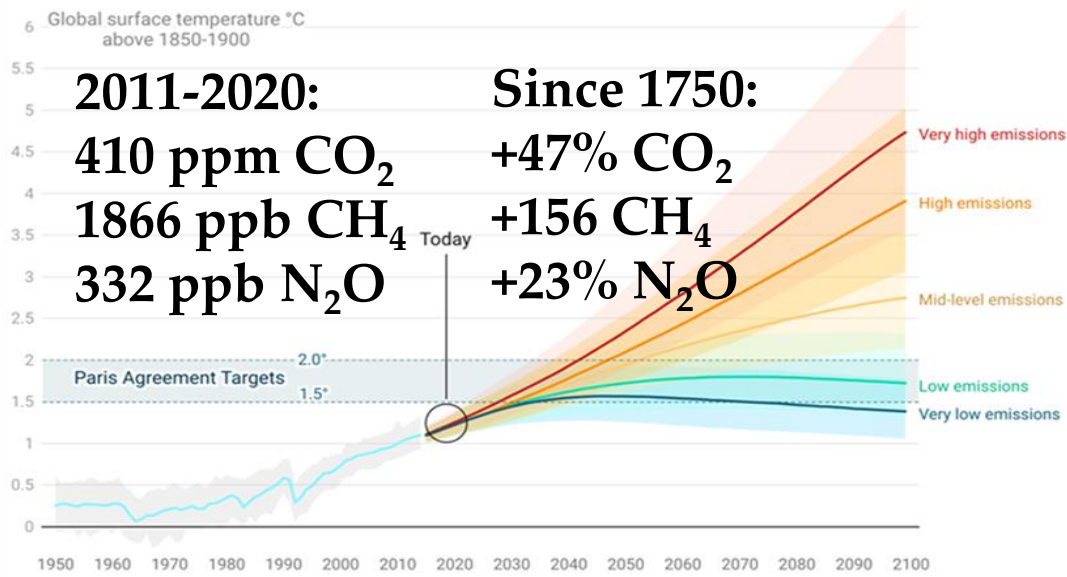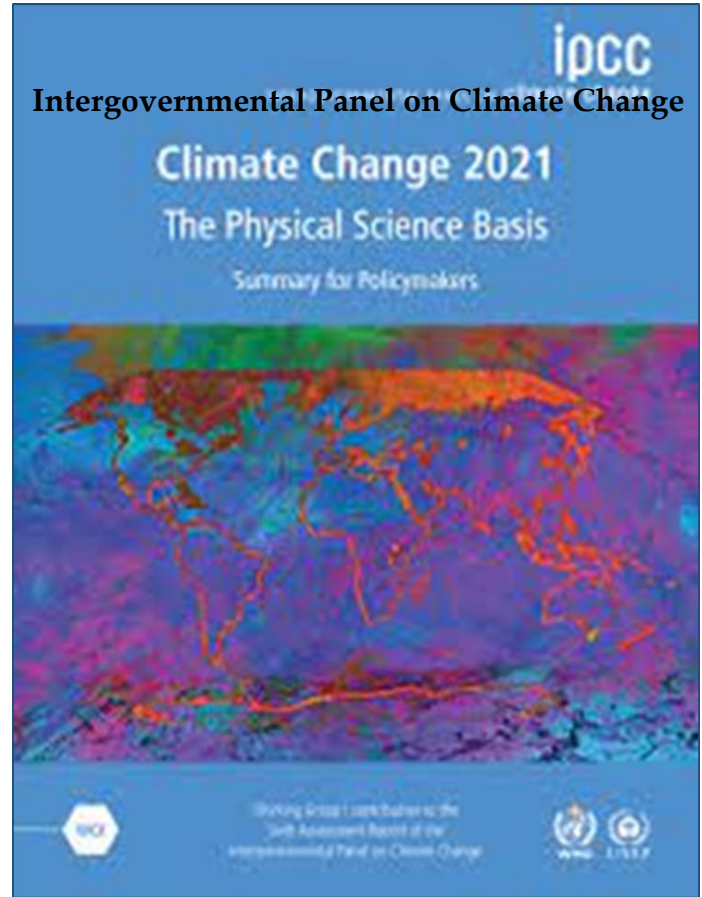

Date of Document:  
7 August 2021

IECPS  
2021

# What is climate change?

**Melting glaciers**

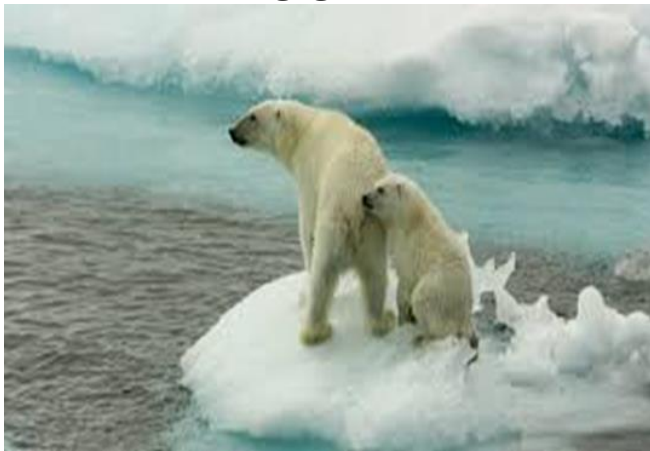

**Floods**

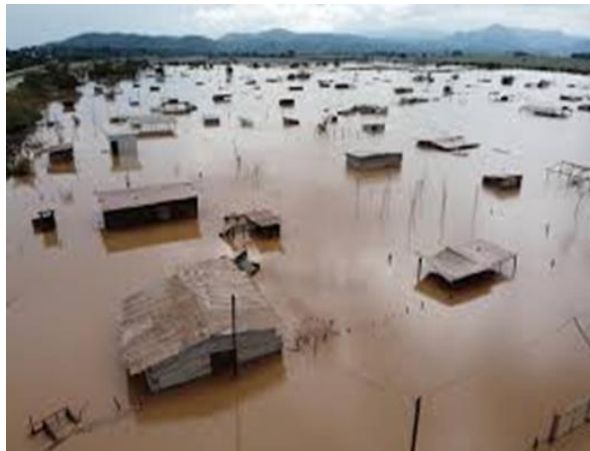

**Hurricanes**

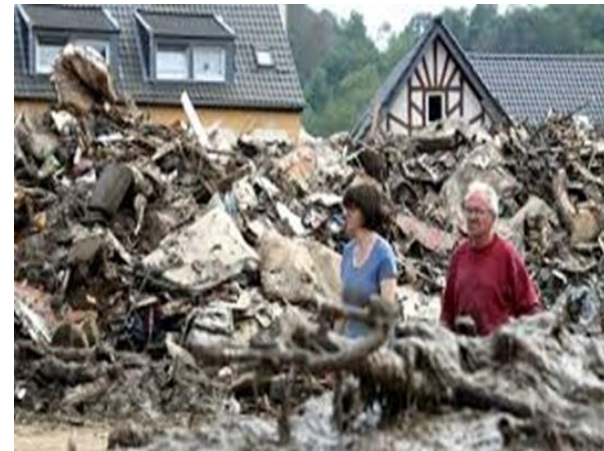

**Fires**

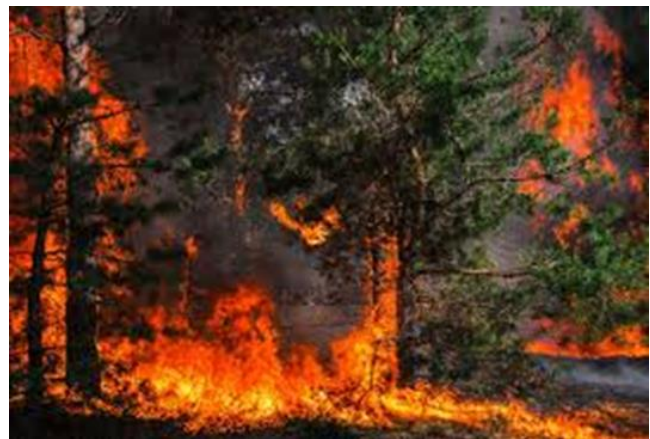

**Typhoons**

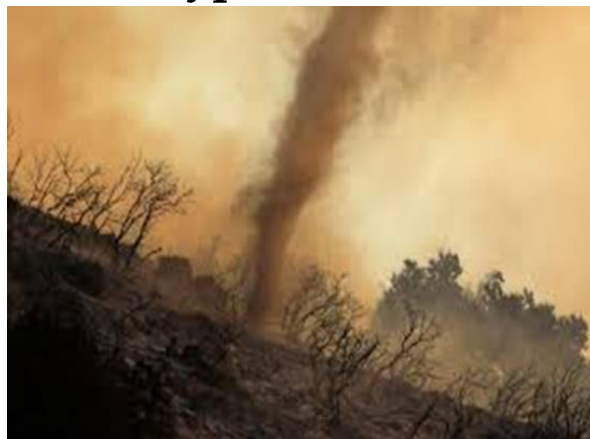

**Prolonged drought**

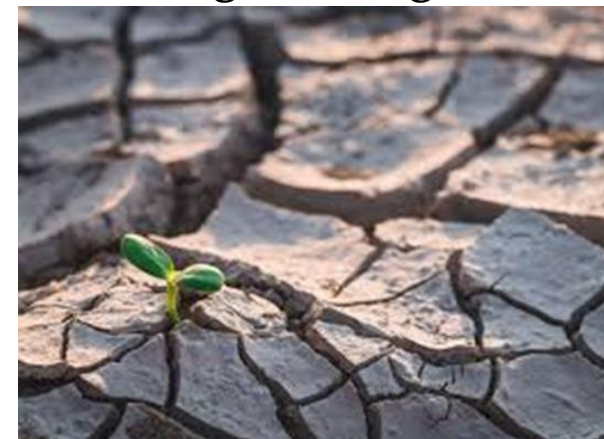



# What is living agriculture in this scenario?

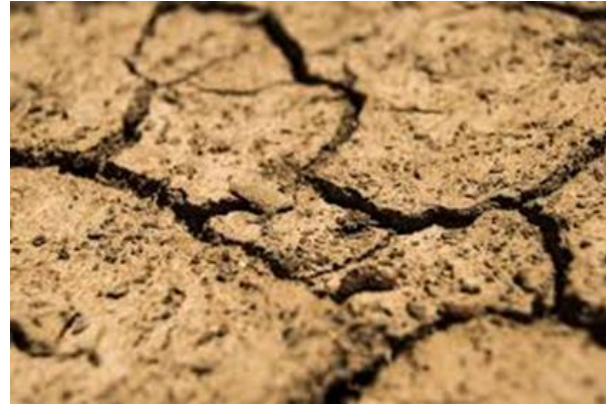

**Drought stress**

## Main abiotic stresses

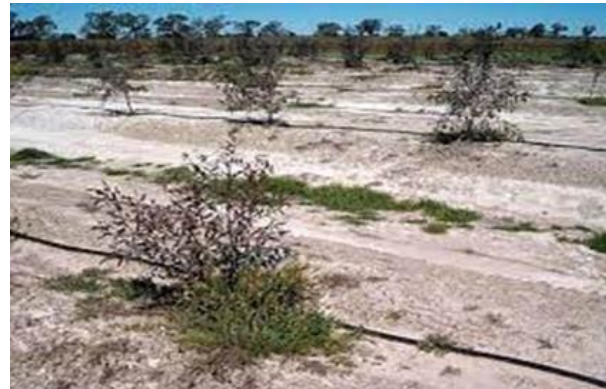

**Salinity stress**

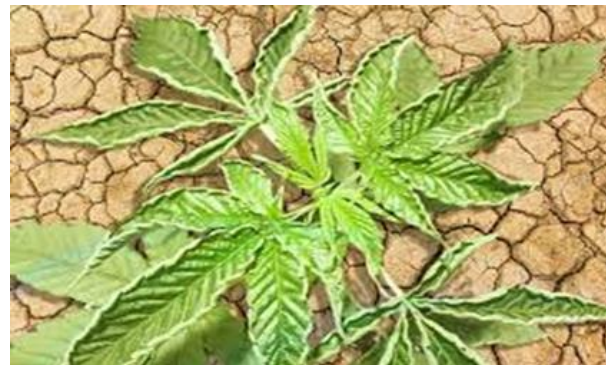

**Heat stress**

# What solutions are suggesting scientists to mitigate plant stress?

We have ONE WORLD

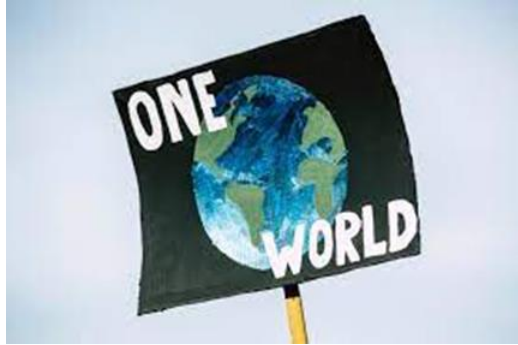

We have NO TIME

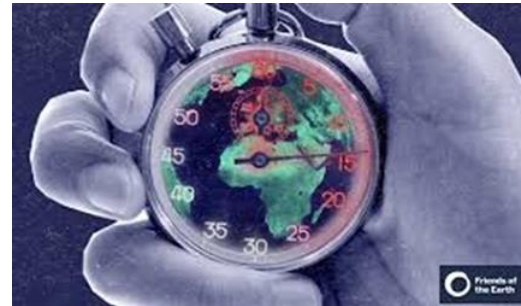

We have to decide

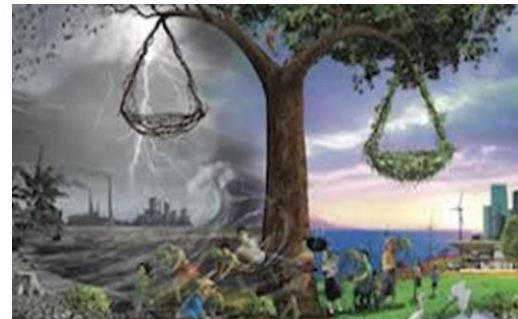

Development of eco-sustainable practices:

- Crop rotation
- Selection of sowing and planting date and harvesting times
- Selection of tolerant cultivars
- Appropriate irrigation techniques and planting density
- Use of mulching films
- Use of wild species resistant to various abiotic stress in breeding programs
- Grafting
- **Use of plant biostimulants**

# Definition by European Biostimulant Industry Council (EBIC):

Biostimulants are not fertilizers or pesticides

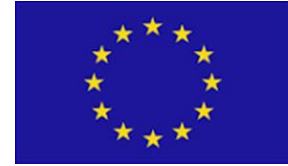

## *Compounds:*

Humic acids  
Protein hydrolysates and amino acids  
Seaweed and plant extracts  
Chitosan and other polysaccharides  
Inorganic compounds

## *Microorganisms:*

Mycorrhizal fungi  
Plant growth-promoting rhizobacteria  
(*Azospirillum*,  
*Azotobacter*, *Rhizobium* spp.)

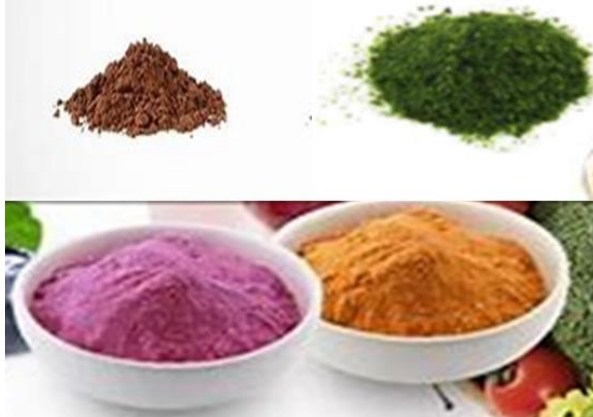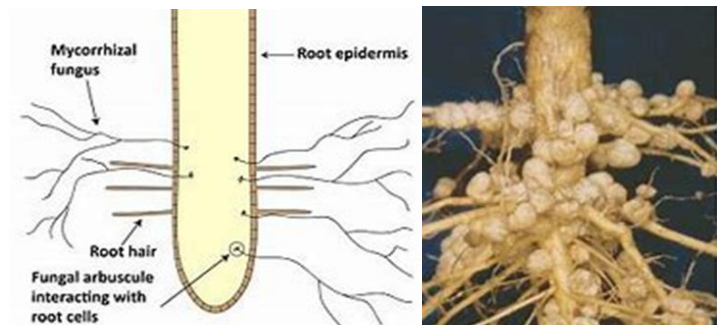



# What is the rule of biostimulants in agriculture?

- **Enhance chemical fertilizers effectiveness**
- **Increase the growth and productivity of crops**
- **Improve the resistance of plants to abiotic and biotic stresses**

# Protein hydrolysates: amino acids, oligo and polypeptides

## Extraction:

### Origin:

#### Leather

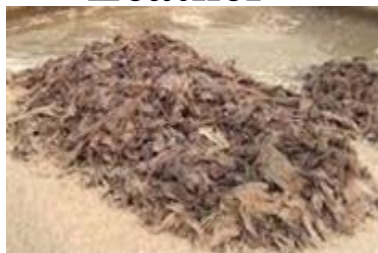

#### Fish

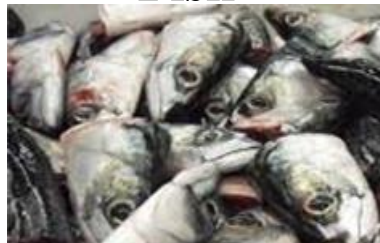

#### Plants

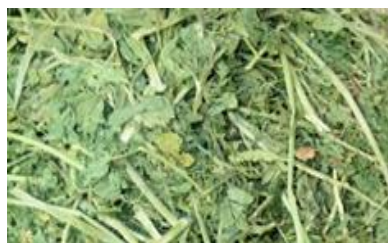

**Chemical hydrolysis:**  
Acids or alkali at temperature up to 138 °C

**Enzymatic hydrolysis:**  
Protease at temperature up to 60°C

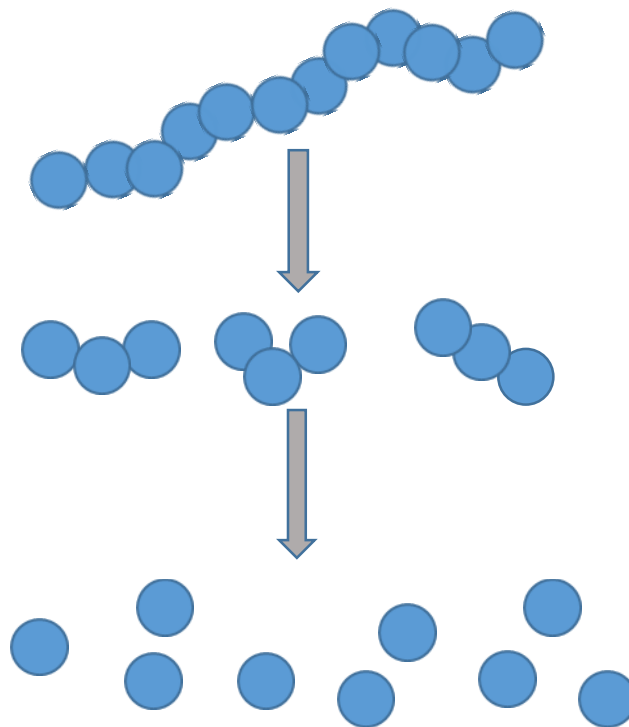

## **Protein hydrolysates:**

- **They act directly on the enzymes of nitrogen and carbon metabolism (NR, NiR, GS, GOCAT, citrate synthase, malate and isocitrate dehydrogenase).**
- **They have auxin and gibberellin-like activities**
- **They stimulate antioxidant enzymes and the synthesis of pigments and secondary metabolites.**
- **They positively influence the root system development**



# Plants can respond differently to different biostimulants at different concentrations

## Interactions between different category of biostimulants:

- **Additive:** each biostimulant maintains the same action as when used alone and therefore each one of them adds its own action to the overall effect of the mixture
- **Synergistic:** the overall effect of the mixture is greater than the sum of the effects of each biostimulant applied individually
- **Antagonistic:** the overall effect of the mixture is lower when biostimulants are used individually

## Aim of the study

To assess the effects of two vegetal-base plant biostimulants alone or in combination:

### A protein hydrolysate (PH)

75% free amino acids and peptides  
22% carbohydrates  
3% mineral nutrients.

### A tropical plant extract (PE)

54% free amino acids and peptides  
23% mineral nutrients  
17% carbohydrates  
6% vitamins and 0.22% phytohormones

The treatments were compared in terms of:

- Yield and growth parameters
  - Mineral composition
  - Leaf quality traits
- of **Rocket plants**

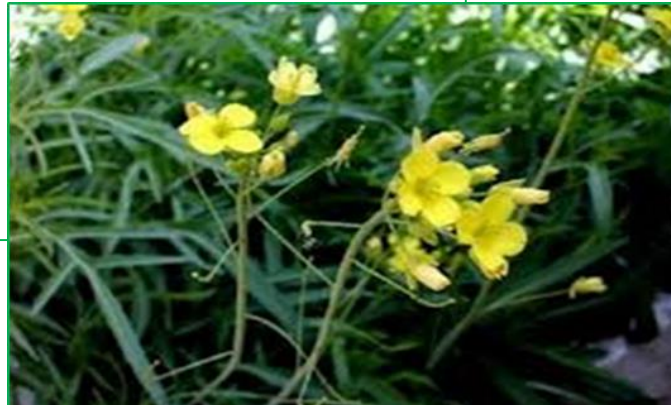

# Experimental design

## 4 Biostimulant treatments:

- Control (non-treated)
- PH (4 ml/L)
- PE (1ml/L)
- PH + PE (4 + 1 ml/L)

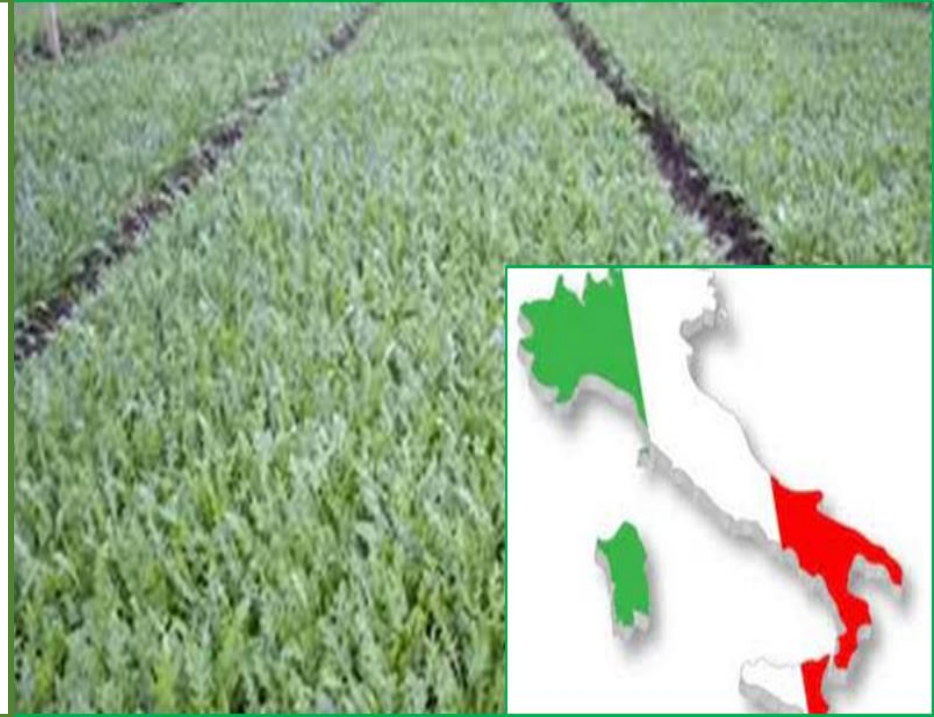

Treatments were arranged in a randomized complete block design with three replicates



# Results and Discussion

## Yield and Dry Biomass Production

| Biostimulant Treatments | Yield (g m <sup>-2</sup> ) |                |               | Total yYield (g m <sup>-2</sup> ) | Dry Biomass (g m <sup>-2</sup> ) |                |              | Total Dry Biomass (g m <sup>-2</sup> ) |
|-------------------------|----------------------------|----------------|---------------|-----------------------------------|----------------------------------|----------------|--------------|----------------------------------------|
|                         | Harvest I                  | Harvest II     | Harvest III   |                                   | Harvest I                        | Harvest II     | Harvest III  |                                        |
| Control                 | 462.8 ± 30.7               | 832.7 ± 15 b   | 403.7 ± 36 b  | 1699.1 ± 20 b                     | 55.6 ± 1.5                       | 67.3 ± 1.5 b   | 30.0 ± 2.9 b | 153.0 ± 4.5 b                          |
| PH                      | 493.0 ± 47.6               | 1246.6 ± 109 a | 821.4 ± 111 a | 2561.1 ± 174 a                    | 53.6 ± 4.9                       | 102.4 ± 13.5 a | 61.1 ± 8.5 a | 217.0 ± 16.5 a                         |
| PE                      | 476.8 ± 59.8               | 1252.2 ± 27 a  | 726.8 ± 73 a  | 2455.7 ± 87 a                     | 49.0 ± 4.8                       | 99.1 ± 3.5 a   | 50.9 ± 3.0 a | 198.9 ± 3.1 a                          |
| PH + PE                 | 542.7 ± 63.9               | 1176.4 ± 111 a | 816.8 ± 53 a  | 2535.9 ± 19 a                     | 57.3 ± 5.8                       | 95.1 ± 14.2 a  | 61.2 ± 5.5 a | 213.5 ± 10.3 a                         |
| Significance            | NS                         | *              | *             | ***                               | NS                               | *              | *            | **                                     |
|                         | +47.1%                     | +95.2%         |               | +48.1%                            | +46.9%                           |                |              | +37.2%                                 |

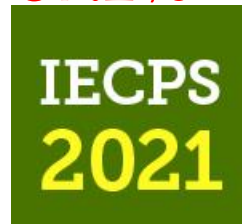

# Results and Discussion

## Soil Plant Analysis Development (SPAD) index and International Commission on Illumination

| Biostimulant Treatments | Harvest II    |             |             |             | Harvest III   |             |             |             |
|-------------------------|---------------|-------------|-------------|-------------|---------------|-------------|-------------|-------------|
|                         | SPAD          | L*          | a*          | b*          | SPAD          | L*          | a*          | b*          |
| Control                 | 34.3 ± 1.20 b | 39.7 ± 0.26 | 13.8 ± 0.34 | 19.8 ± 0.48 | 32.0 ± 1.53 b | 40.4 ± 0.15 | 13.6 ± 0.39 | 19.6 ± 0.64 |
| PH                      | 38.7 ± 0.67 a | 38.3 ± 0.57 | 13.3 ± 0.26 | 19.4 ± 0.43 | 37.7 ± 1.45 a | 39.3 ± 0.77 | 14.1 ± 0.28 | 20.9 ± 0.64 |
| PE                      | 37.7 ± 0.88 a | 39.0 ± 0.85 | 13.7 ± 0.52 | 20.0 ± 0.73 | 39.7 ± 1.45 a | 39.8 ± 0.49 | 14.5 ± 0.14 | 21.3 ± 0.19 |
| PH + PE                 | 38.7 ± 1.76 a | 39.1 ± 0.59 | 13.6 ± 0.34 | 19.5 ± 0.79 | 39.7 ± 1.33 a | 39.5 ± 0.19 | 14.0 ± 0.31 | 20.3 ± 0.63 |
| Significance            | *             | NS          | NS          | NS          | *             | NS          | NS          | NS          |

**+22.4%**

**+21.8%**

**IECPS  
2021**

# Results and Discussion

## Mineral content

| Biostimulant Treatments | N (g kg <sup>-1</sup> dw) |             | P (g kg <sup>-1</sup> dw) |             | K (g kg <sup>-1</sup> dw) |               | Ca (g kg <sup>-1</sup> dw) |                | Mg (g kg <sup>-1</sup> dw) |               | Na (g kg <sup>-1</sup> dw) |             |
|-------------------------|---------------------------|-------------|---------------------------|-------------|---------------------------|---------------|----------------------------|----------------|----------------------------|---------------|----------------------------|-------------|
|                         | Harvest II                | Harvest III | Harvest II                | Harvest III | Harvest II                | Harvest III   | Harvest II                 | Harvest III    | Harvest II                 | Harvest III   | Harvest II                 | Harvest III |
| Control                 | 4.85 ± 0.10               | 5.03 ± 0.10 | 2.83 ± 0.19               | 2.93 ± 0.16 | 44.5 ± 0.51 b             | 37.5 ± 1.43 b | 18.1 ± 0.10 b              | 26.2 ± 0.20 b  | 3.03 ± 0.24                | 2.90 ± 0.21 b | 2.96 ± 0.10                | 2.64 ± 0.78 |
| PH                      | 5.01 ± 0.14               | 4.99 ± 0.18 | 3.20 ± 0.05               | 3.02 ± 0.14 | 48.1 ± 0.64 b             | 54.3 ± 1.34 a | 23.8 ± 0.38 a              | 34.0 ± 0.54 a  | 3.13 ± 0.12                | 4.16 ± 0.35 a | 2.16 ± 0.43                | 4.03 ± 0.14 |
| PE                      | 4.95 ± 0.18               | 4.71 ± 0.16 | 3.14 ± 0.13               | 3.08 ± 0.06 | 52.9 ± 2.26 a             | 53.9 ± 2.19 a | 25.0 ± 0.56 a              | 30.0 ± 2.10 ab | 3.31 ± 0.34                | 3.87 ± 0.24 a | 2.57 ± 0.66                | 3.47 ± 0.67 |
| PH + PE                 | 4.89 ± 0.16               | 4.80 ± 0.15 | 2.87 ± 0.10               | 3.10 ± 0.17 | 48.3 ± 1.28 b             | 56.6 ± 1.61 a | 25.1 ± 0.34 a              | 32.4 ± 1.47 a  | 3.32 ± 0.32                | 4.02 ± 0.10 a | 2.02 ± 0.87                | 4.42 ± 0.22 |
| Significance            | NS                        | NS          | NS                        | NS          | *                         | ***           | ***                        | *              | NS                         | *             | NS                         | NS          |

+11.5%      +44.3%      +31.7%      +29.3%      +37.9%
   
 +38.9%      +37.2%      +23.2%



# Results and Discussion

## Quality parameters

| Biostimulant Treatments | Chlorophyll<br>(mg g <sup>-1</sup> fw) |                | Nitrate<br>(mg kg <sup>-1</sup> fw) |             | Total Phenols<br>(mg gallic acid eq. g <sup>-1</sup> dw) |             | Total Ascorbic Acid<br>(mg g <sup>-1</sup> fw) |               |
|-------------------------|----------------------------------------|----------------|-------------------------------------|-------------|----------------------------------------------------------|-------------|------------------------------------------------|---------------|
|                         | Harvest II                             | Harvest III    | Harvest II                          | Harvest III | Harvest II                                               | Harvest III | Harvest II                                     | Harvest III   |
|                         | Control                                | 0.96 ± 0.14    | 0.88 ± 0.09 b                       | 4630 ± 644  | 4428 ± 446                                               | 3.98 ± 0.07 | 4.71 ± 0.11                                    | 17.3 ± 3.22 c |
| PH                      | 1.34 ± 0.17                            | 1.03 ± 0.06 ab | 4558 ± 375                          | 5611 ± 377  | 3.95 ± 0.38                                              | 5.03 ± 0.67 | 23.6 ± 1.11 bc                                 | 22.0 ± 2.08 b |
| PE                      | 1.22 ± 0.14                            | 1.11 ± 0.05 a  | 4634 ± 211                          | 5897 ± 489  | 3.46 ± 0.20                                              | 4.32 ± 0.14 | 28.0 ± 0.53 b                                  | 31.3 ± 2.29 a |
| PH + PE                 | 1.43 ± 0.18                            | 1.22 ± 0.04 a  | 4772 ± 396                          | 4380 ± 631  | 3.84 ± 0.06                                              | 4.46 ± 0.10 | 37.0 ± 1.79 a                                  | 36.3 ± 3.25 a |
| Significance            | NS                                     | *              | NS                                  | NS          | NS                                                       | NS          | ***                                            | ***           |

+22%

+33.3%

+62.8% +109.4%

+115% +143.6%

# Results and Discussion

## Principal Component Analysis (PCA)

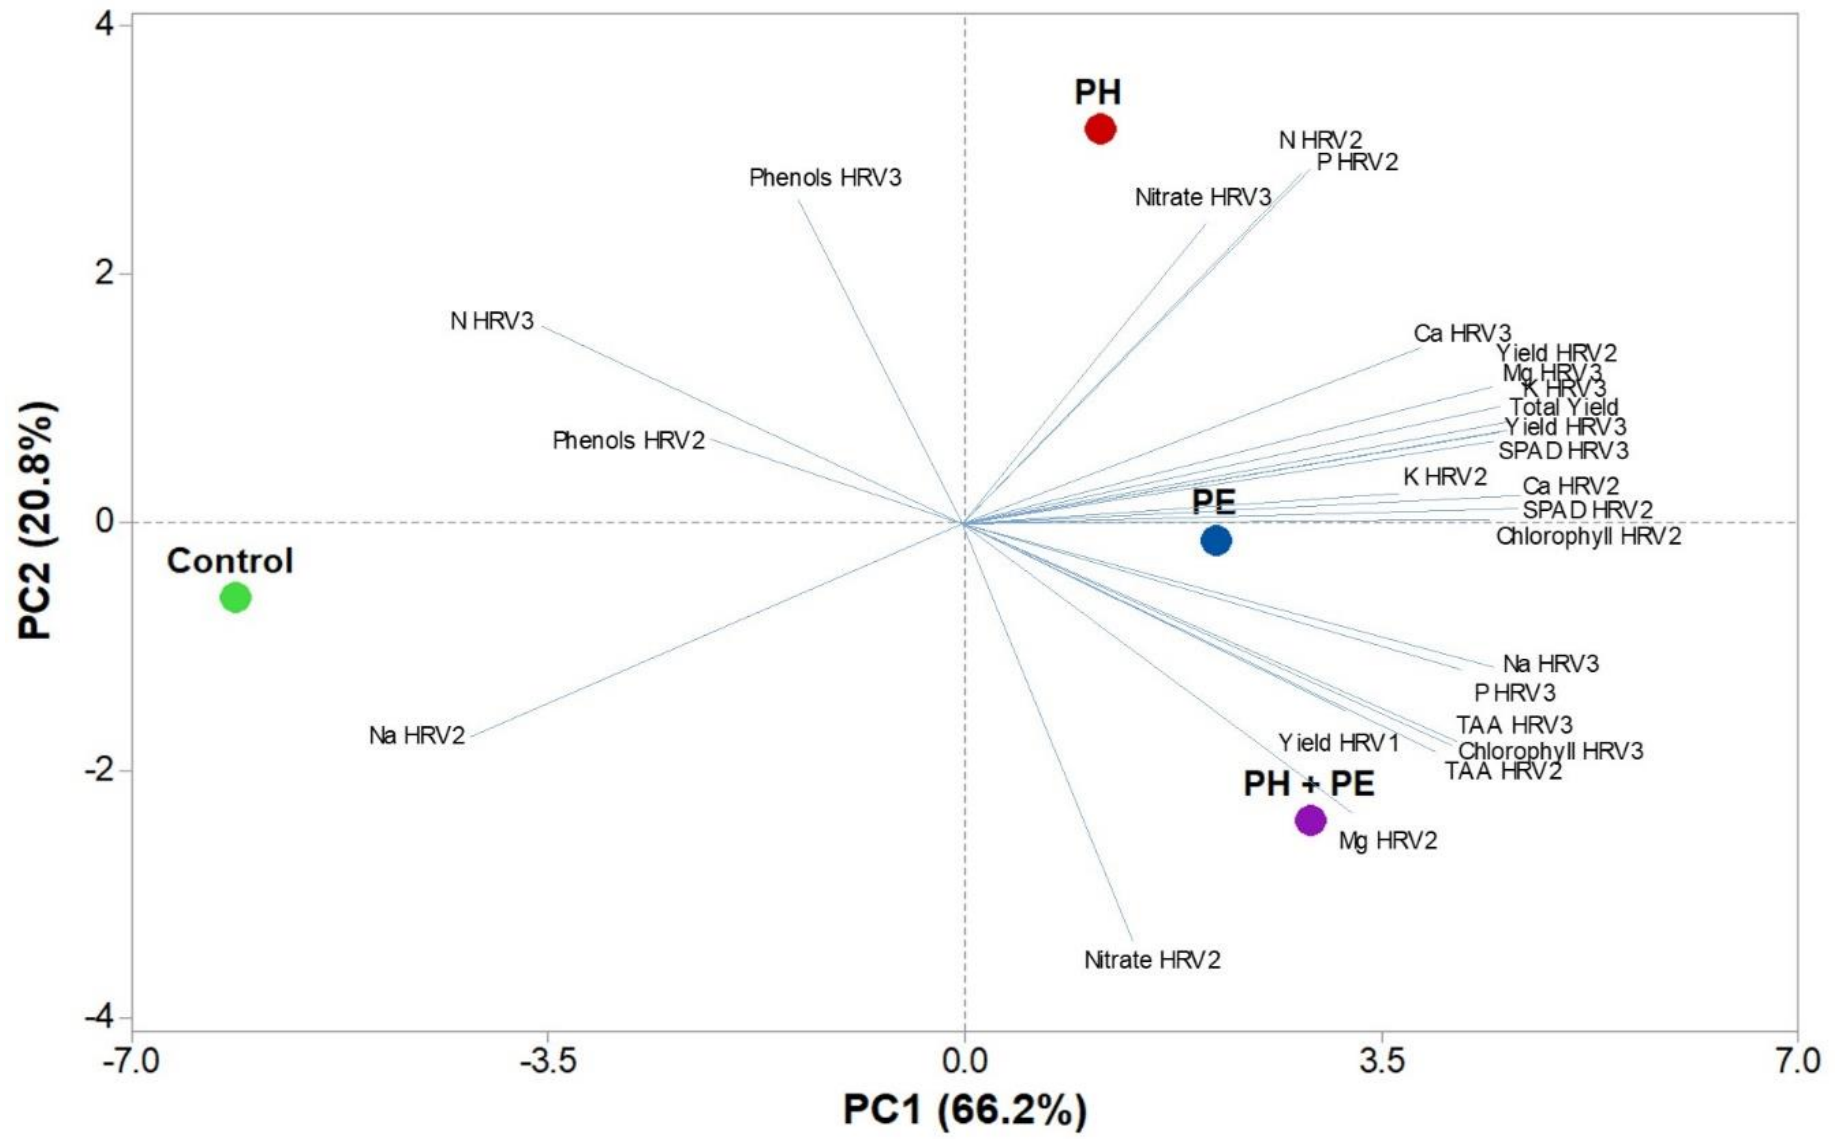

# Conclusions

- **Auxym® (PE) and Trainer® (PH) application increased the total yield and total dry biomass of greenhouse-grown rocket plants, 48% and 37% on average, compared to untreated plants.**
- **The two biostimulants resulted in a higher mineral status of potassium, calcium and magnesium, as well as chlorophyll content in treated plants**
- **A synergistic effect of the two biostimulants was seen in the case of total ascorbic acid content**
- **Mixing these two types of biostimulants resulted in a synergistic effect on the quality of the produce with a half dose of each stimulant applied, which was shown to improve plant performance in terms of growth and quality**

**Thank you for your attention**

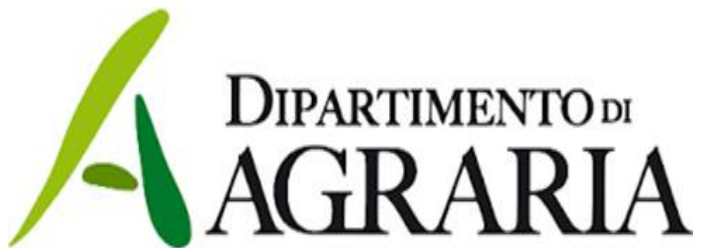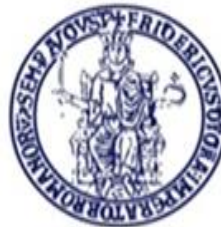

UNIVERSITÀ DEGLI STUDI DI NAPOLI  
**FEDERICO II**

**IECPS  
2021**
